# Supplementary material
Source: Springer Nature journal article supplement (https://www.springermedizin.de/resource/supplementary/12943_2013_1510_MOESM6_ESM.pdf/9552302)

A

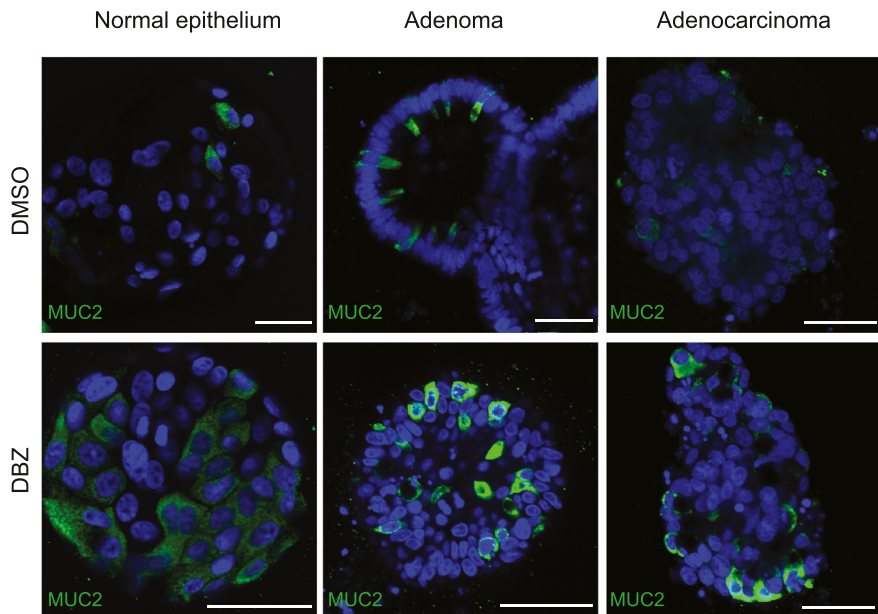

B

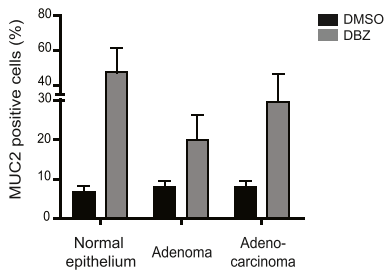

C

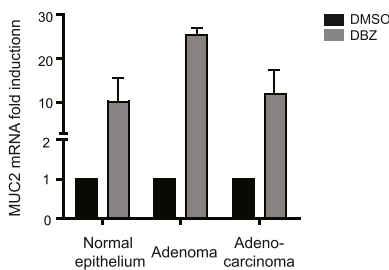

D

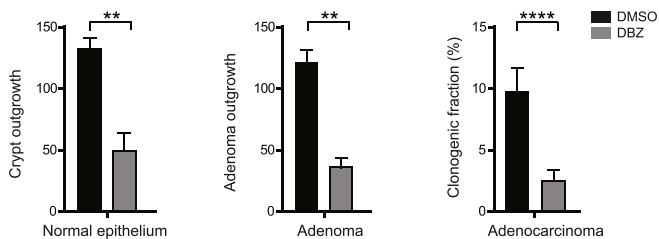

Supplement: MOESM6 [file 9552302]
